# Supplementary material for: Modeling the navigating forces behind BSA aggregation in a microfluidic chip
Source: Royal Society of Chemistry journal article supplement (doi:10.1039/d4sm01148a), 2025-01-01
Supplement: d4sm01148a1.pdf [file d4sm01148a1.pdf]

1                                    Supporting Information: Modeling The  
2                                    Navigating Forces Behind BSA Aggregation in a  
3                                    Microfluidic Chip

4                                    Zahra Haghparas,<sup>a</sup> Mohammadjavad Bouloorchi Tabalvandani,<sup>b</sup> Payam Arghavani,<sup>a</sup>  
5                                    Soroush Behjati Hosseini,<sup>a</sup> Majid Badieirostami,<sup>\*b</sup> Mehran Habibi-Rezaei<sup>c</sup> and Ali Akbar  
6                                    Moosavi-Movahedi<sup>\*a</sup>

7                                    *<sup>a</sup>Institute of Biochemistry and Biophysics, University of Tehran, Tehran, Iran*

8                                    *<sup>b</sup>MEMS Lab, School of Electrical and Computer Engineering, College of Engineering, University of Tehran, Tehran, Iran*

9                                    *<sup>c</sup>School of Biology, College of Science, University of Tehran, Tehran, Iran*

10                                   Corresponding Authors: [mbadieie@ut.ac.ir](mailto:mbadieie@ut.ac.ir) (M. Badieirostami) and [moosavi@ut.ac.ir](mailto:moosavi@ut.ac.ir) (A. A. Moosavi-  
11                                   Movahedi)

### 23 **Designed microfluidic chip**

24 According to research on protein aggregation in microfluidic chips,<sup>1-3</sup> a chip was designed and  
25 fabricated with a serpentine channel containing seven loops to promote complete protein  
26 aggregation. The fabricated microfluidic chip is shown in Fig. S1. The chip incorporated two inlets  
27 for protein introduction to investigate the influence of advective mixing on this process. Two  
28 separate chips were constructed (Fig. S2) with distinct outlet reservoir locations:  $M_1$ , located after  
29 three loops (Fig. S2A), and  $M_2$ , positioned at the channel's end (Fig. S2B), allowing the formation  
30 of the aggregates to be monitored.

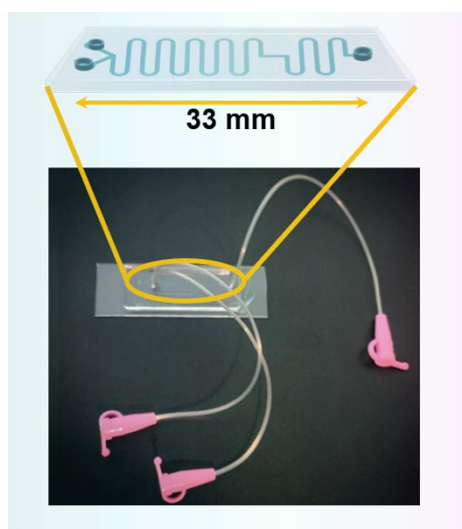

31 **Fig. S1** Fabricated microfluidic chip.

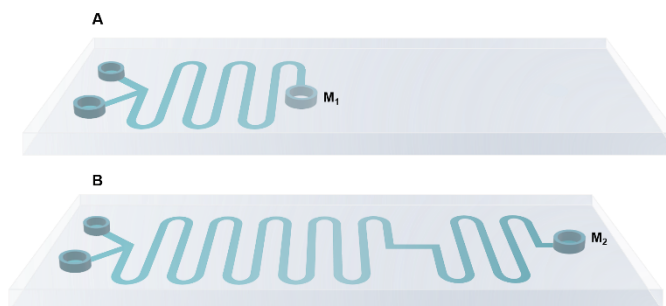

32 **Fig. S2** scheme of microfluidic chips with (A)  $M_1$  and (B)  $M_2$  reservoirs.

### 33 **Purpose-built heating plate**

34 A custom heating plate facilitated precise temperature control for the microfluidic chip. The  
35 hotplate utilized a heating element, thermocouple, and digital thermostat. The 5-meter heating  
36 element, powered by standard 220V electricity without a voltage converter, achieved temperatures

37 up to 400 °C. The thermocouple and thermostat ensured accurate temperature setting and  
38 monitoring. The heating element was spirally adhered between two 20 cm square Pyrex glasses  
39 using thermal adhesive. This design allowed a central cavity to accommodate the chip and enabled  
40 real-time microscopic imaging within the microchannels while maintaining the desired  
41 temperature. A schematic of the heating plate is visible in Fig. S3.

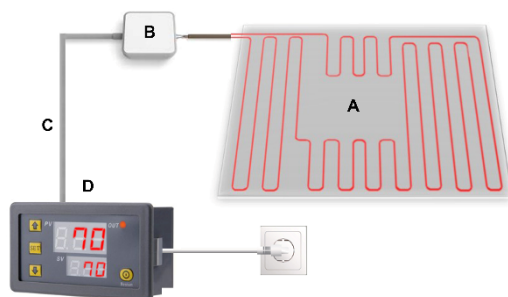

42 **Fig. S3** The purpose-built hotplate contains (A) a glass hotplate, (B) an adaptor, (C) a thermocouple, and (D) a  
43 digital thermostat.

#### 44 **Microscopic visualization of BSA aggregation in vial**

45 Microscopic visualization revealed the progression of protein aggregation within the vial over time  
46 (Fig. S4). Figs. S4A and S4B show images taken 5 and 10 minutes after exposure to 70 °C,  
47 respectively. No ThT fluorescence (left panels) is observed, indicating minimal aggregation at this  
48 stage. However, the corresponding SEM images (right panels) reveal the formation of early-stage  
49 clusters. Fig. S4C depicts the structures formed after 30 minutes. A slight increase in ThT emission  
50 suggests some aggregation, while the SEM image confirms the presence of larger clusters. Finally,  
51 Fig. S4D showcases the dramatic change after 6 hours. The left panel displays a significant ThT  
52 signal, indicating extensive amyloid-like aggregates formation. The corresponding SEM image  
53 visualizes these mature aggregates.

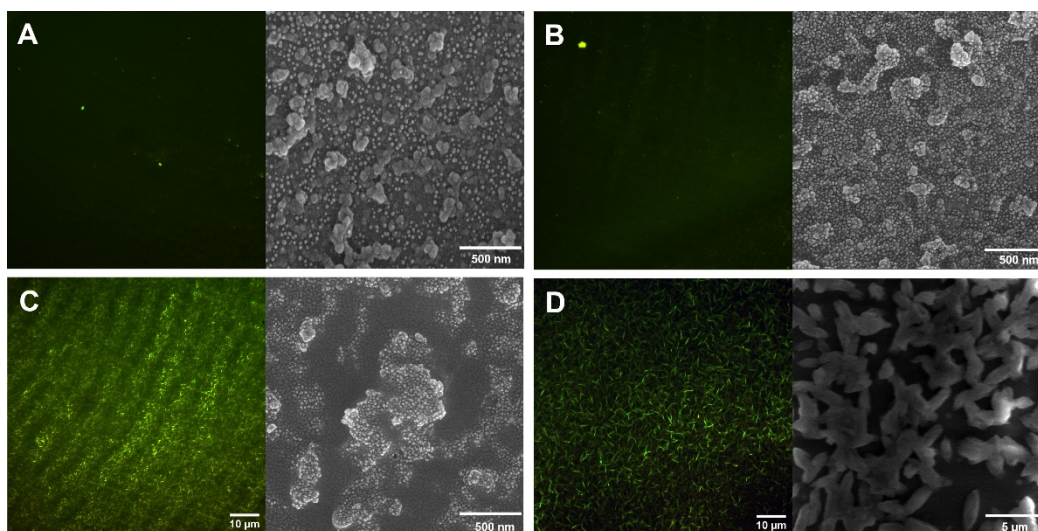

54

55 **Fig. S4** Microscopic visualization of BSA aggregation pathway at 2.5 mg.ml<sup>-1</sup> following exposure to 70 °C. (A) 5  
 56 minutes, (B) 10 minutes, (C) 30 minutes, (D) 360 minutes. The left panels show fluorescence microscopy with 5 mM  
 57 ThT staining and the right panels show SEM images.

#### 58 Cell viability assay

59 The cytotoxicity of the formed amyloid-like aggregates was assessed using the MTT assay on  
 60 MCF-7 breast cancer cells (Fig. S5).

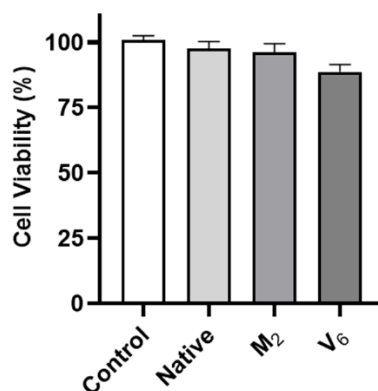

61 **Fig. S5** MCF-7 cell viability after incubation with BSA samples. Cells were treated with 30 μg.ml<sup>-1</sup> of native BSA,  
 62 V<sub>6</sub>, and M<sub>2</sub> samples, and viability was measured using the MTT assay. Data represent mean ± SEM from m  
 63 independent repetitions (m=3).

#### 64 Modeling the behavior of BSA clusters in the microfluidic chip

65 An ensemble of 200 particles was uniformly distributed throughout the serpentine microchannels  
 66 at t = 0 to visualize the behavior of BSA clusters inside the channel. The simulation results  
 67 demonstrated the gradual deposition of the clusters onto the sidewalls as time passed (Movie S1).  
 68 In this movie, the cold spectrum (blue) refers to slower particles, and the hot spectrum (red)

69 indicates faster clusters. The simulation considered three key factors: Stokes' drag force, Brownian  
70 movement, and particle-particle interactions. The simulated Brownian movement is defined as  
71 equation 1,

$$72 \quad F_B = \zeta \sqrt{\frac{12\pi k_B \mu T r_p}{\Delta t}} \quad (1)$$

73 where  $\zeta$  is a random number with the normal distribution (zero mean and standard deviation of  
74 one),  $k_B$  signifies Boltzmann constant,  $\mu$  stands for the dynamic viscosity of the fluid,  $T$  illustrates  
75 the temperature of the fluid in Kelvin,  $r_p$  represents the particle radius, and  $\Delta t$  is the time step  
76 taken by the solver. The Stokes' drag force is denoted as equation 2,

$$77 \quad F_D = \left(\frac{1}{\tau_p}\right) m_p (u - v) \quad (2)$$

78 where  $m_p$  is the particle mass,  $\tau_p$  represents the particle velocity response time,  $\mathbf{u}$  symbolizes the  
79 fluid velocity, and  $\mathbf{v}$  corresponds to the particle velocity. Equation 3 determines the particle  
80 velocity response time for Stokes' drag law,

$$81 \quad \tau_p = \frac{\rho_p d_p^2}{18\mu} \quad (3)$$

82 where  $\rho_p$ ,  $d_p^2$ , and  $\mu$  denote particle density, diameter, and the fluid's dynamic viscosity,  
83 respectively. This combined approach allowed us to investigate how the interplay of these forces  
84 influenced the movement and deposition of BSA clusters within the microfluidic system. As  
85 shown in Movie S1, faster particles move swiftly through the channel, while slower particles  
86 deposit onto the channel sidewalls leading to conformational changes in the deposited particles. In  
87 Movie S1, a segment of the microchannel is captured at different time points, as illustrated in Fig.  
88 S6. The dynamic movement of spherical particles (300 nm in diameter) over time indicates that  
89 slower particles (cold spectrum) tend to deposit onto the channel sidewalls.

90 **Movie S1** The BSA cluster's behavior in the microfluidic chip is shown here for 300 nm particles in diameter, which  
91 is downloadable using the below link. The cold-spectrum refers to slower particles, and the hot-spectrum refers to  
92 faster clusters.

93

94

**Download Movie S1:** <https://drive.google.com/file/d/1r2wpbTvCtuHLc3SOWV->

95

[IgTWzwoIFqVIM/view?usp=sharing](https://drive.google.com/file/d/1r2wpbTvCtuHLc3SOWV-IgTWzwoIFqVIM/view?usp=sharing)

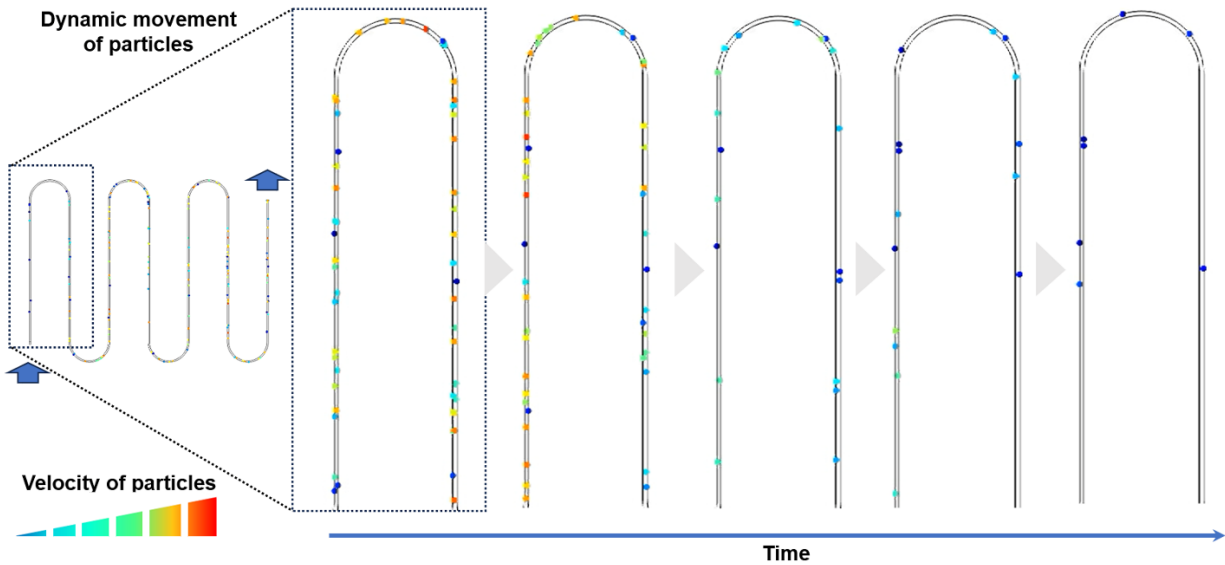

96 **Fig. S6** Dynamic movement of 300 nm spherical particles within a microchannel segment over time. Slower particles  
 97 (cold spectrum) are observed depositing onto the channel sidewalls, as captured in different time points shown in  
 98 Movie S1.

99

100 This simulation was performed for particles smaller than 100 nm in diameter (50 nm to be  
 101 considered). As can be seen in Movie S2, the slower particles (blue) indicated the least tendency  
 102 to deposit onto the channel sidewalls.

103

104 **Movie S2** The behavior of BSA clusters within the microfluidic chip is demonstrated here for 50 nm diameter particles.  
 105 The data can be downloaded using the link below. The cold spectrum represents slower particles, while the hot  
 106 spectrum corresponds to faster clusters.

107 **Download Movie S2:** [https://drive.google.com/file/d/1svdQ0rsMfe7Jyzj9RNCgjEZwgApNq\\_Qn/view?usp=sharing](https://drive.google.com/file/d/1svdQ0rsMfe7Jyzj9RNCgjEZwgApNq_Qn/view?usp=sharing)

108 **Heat transfer simulation in microfluidic chip**

109 COMSOL Multiphysics simulations ensured sufficient energy transfer within the microfluidic chip  
 110 to drive protein aggregation. We modeled heat transfer in the fluid under steady-state conditions  
 111 to analyze heat exchange within the device. Both the channel and incoming fluid were initially set  
 112 to 25 °C. The bottom boundary, representing a heated hotplate, was assigned a constant  
 113 temperature of 70 °C. Other boundaries were considered thermally isolated, neglecting heat loss  
 114 to the environment due to PDMS's low thermal conductivity. This simplification is justified for

115 this material. The heat transfer inside the fluid flowing through the channel was then solved using  
 116 equations 4 and 5 as described below,

$$117 \quad \rho C_p u \cdot \nabla T + \nabla \cdot q = Q + Q_{vd} \quad (4)$$

$$118 \quad q = -k \nabla T \quad (5)$$

119 where  $\rho$  is the fluid density,  $C_p$  is the specific heat capacity,  $q$  is the heat flux by conduction,  $Q_{vd}$   
 120 is the viscous dissipation in the fluid,  $Q$  represents heat sources other than viscous dissipation,  $k$  is  
 121 the thermal conductivity, and  $\nabla T$  is the temperature gradient across the boundary. As shown in  
 122 Fig. S7, the temperature profile within the initial section of the channel indicates a rapid rise in the  
 123 fluid temperature to the desired 70 °C. This temperature is maintained throughout the channel,  
 124 confirming sufficient energy delivery for the aggregation process.

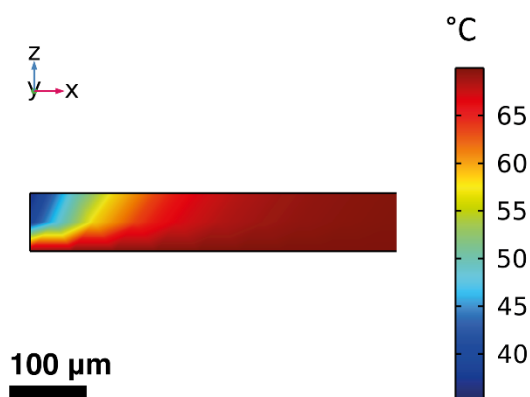

125 **Fig. S7** Simulated temperature profile within the microfluidic channel.

## 126 **Gibbs free energy**

127 Equation 6 was employed to calculate the Gibbs free energy difference ( $\Delta G$ ) for BSA thermal  
 128 denaturation (aggregation in bulk) within a two-state model (N and U).<sup>4</sup>

$$129 \quad \Delta_N^U G = \Delta_N^U H(T) - T \Delta_N^U S(T) \quad (6)$$

130 The enthalpy and entropy were identified by equations 7 and 8, respectively.<sup>4</sup>

$$131 \quad \Delta H(T) = \Delta H(T_e) + \int_{T_e}^T \Delta_N^U C_p dT \quad (7)$$

$$\Delta S(T) = \frac{\Delta H(T_e)}{T_e} + \int_{T_e}^T \Delta_N^U C_p d \ln T \quad (8)$$

132

133 Here,  $T_e$  represented the temperature at which both states had an equal probability. Assuming

134  $\Delta_N^U C_p$  to be independent of temperature, driven by the following equation,<sup>4</sup>

$$\Delta_N^U G(T) = \Delta_N^U H(T_e) \left(1 - \frac{T}{T_e}\right) - \Delta_N^U C_p(T_e) \left(T_e - T + T \ln \frac{T}{T_e}\right) \quad (9)$$

135

136 As proven by *Ling Fu et al.*,<sup>4</sup> the enthalpy change for BSA aggregation at the obtained  $T_e$  (110 °C)

137 is 44 kJ.mol<sup>-1</sup>, with a corresponding  $\Delta C_p$  of 0.32 kJ.K<sup>-1</sup>.mol<sup>-1</sup>. Using these values and Eq. 9, BSA's

138 estimated  $\Delta G$  at 70 °C is 3.9 kJ.mol<sup>-1</sup>.

### 139 Thermal unfolding energy in the microfluidic chip

140 The required thermal unfolding energy per microchannel volume was estimated. We considered

141 the BSA concentration (2.5 mg.ml<sup>-1</sup>), its molecular weight (66,500 g.mol<sup>-1</sup>), the calculated Gibbs

142 free energy for unfolding (3.9 kJ.mol<sup>-1</sup>), and an assumed microchannel volume (50  $\mu$ m in width

143 and 60  $\mu$ m in height, resulting in a volume of 1.5 $\times$ 10<sup>-10</sup> L). This analysis indicated an energy

144 requirement of approximately 2.2 $\times$ 10<sup>-14</sup> J per microchannel volume to activate BSA molecules.

### 145 Lennard-Jones parameters versus various particle diameters

146 The DLVO pair potential was visualized using MATLAB for clusters with various diameters (Fig.

147 S8). The Lennard-Jones parameters were extracted from these visualizations, revealing a strong

148 correlation between particle diameter and interaction strength (Table S1). Accordingly, particles

149 smaller than 100 nm in diameter predominantly experience electrostatic repulsion. In contrast,

150 larger particles are more prone to van der Waals attraction, leading to mutual adsorption. As shown

151 in Table S1 the interaction strength increases with particle size.

152

**Table S1.** The Lennard-Jones potential for clusters with different diameters.

| Clusters Diameter (nm)       | 50 nm | 75 nm | 100 nm | 200 nm | 300 nm |
|------------------------------|-------|-------|--------|--------|--------|
| Intermolecular Distance (nm) | 61.75 | 85.3  | 109    | 207.24 | 306    |



**Interaction  
Strength (J)**

$$-0.0994 \times 10^{-21}$$

$$-0.322 \times 10^{-21}$$

$$-0.62 \times 10^{-21}$$

$$-2.46 \times 10^{-21}$$

$$-5.02 \times 10^{-21}$$

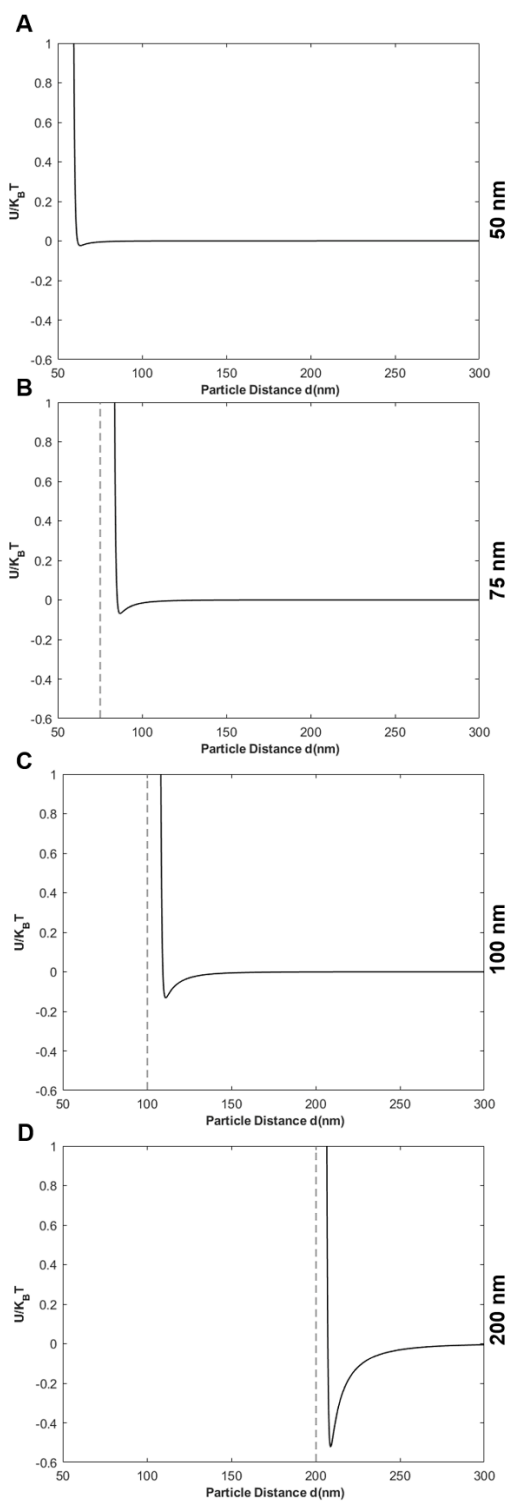

153 **Fig. S8** Modeling the DLVO pair potential for spherical particles in a system containing 261.39 mol.m<sup>-3</sup> ion at 70 °C  
154 with  $\kappa^{-1} = 0.645$  nm and  $A = 1$  k<sub>B</sub>T. The simulations are shown for varying particle radii ( $r$ ) and surface potentials ( $\Psi$ ).  
155 (A)  $r = 25$  nm,  $\Psi = 0.00036$  mV; (B)  $r = 37.5$  nm,  $\Psi = 0.00016$  mV; (C)  $r = 50$  nm,  $\Psi = 0.0000916$  mV, and (D)  $r =$   
156  $100$  nm,  $\Psi = 0.000023$  mV.

### 157 **Raynolds number**

158 The relative Raynolds number for particles in the microfluidic chip is calculated using equation  
159 10,

$$160 \quad Re = \frac{\rho U D_H}{\mu} \quad (10)$$

161 where  $\rho$  represents the density,  $U$  ( $\sim 0.01$  m.s<sup>-1</sup>) denotes the average velocity,  $D_H$  refers to the  
162 hydraulic diameter, and  $\mu$  is the dynamic viscosity. The hydraulic diameter for a rectangular cross-  
163 section is obtained according to equation 11,

$$164 \quad D_H = \frac{2 \times a \times b}{a + b} \quad (11)$$

165 where  $a$  ( $a=50$   $\mu$ m) denotes the width and  $b$  ( $b=60$   $\mu$ m) refers to the height. Using equations 10  
166 and 11, the Raynolds number is estimated at 0.6.

### 167 **Ionic concentration**

168 To prepare the solution for examinations, native BSA was dissolved in 100 mM phosphate buffer  
169 (pH 7.4). The Henderson-Hasselbalch Equation<sup>5</sup> (equation 12) with a fixed pKa 7.2 was used to  
170 estimate the solution's ionic concentration.

$$171 \quad pH = pKa + \log \frac{[A^-]}{[HA]} \quad (12)$$

172 This calculation resulted in estimated concentrations of 38.61 mM [H<sub>2</sub>PO<sub>4</sub><sup>-</sup>], 61.39 mM [HPO<sub>4</sub><sup>2-</sup>],  
173 and 161.39 mM [Na<sup>+</sup>], leading to a total ionic concentration of 261.39 mM.

### 174 **Surface hydrophobicity of vials and PDMS**

175 The contact angles of water and BSA droplets on both vial and PDMS surfaces were measured  
176 (Fig. S9). Water contact angles were significantly higher for PDMS ( $60 \pm 1^\circ$ ) compared to the vial  
177 ( $17 \pm 2^\circ$ ), indicating a more hydrophobic PDMS surface (Figs. S9A & S9B). Similarly, BSA  
178 droplets exhibited a higher contact angle on PDMS ( $89 \pm 0.5^\circ$ ) compared to the vial ( $61.5 \pm 1^\circ$ ),

179 suggesting preferential interaction with the hydrophobic PDMS (Figs. S9C & S9D). Notably, both  
180 the inner and outer vial surfaces are composed of polypropylene.

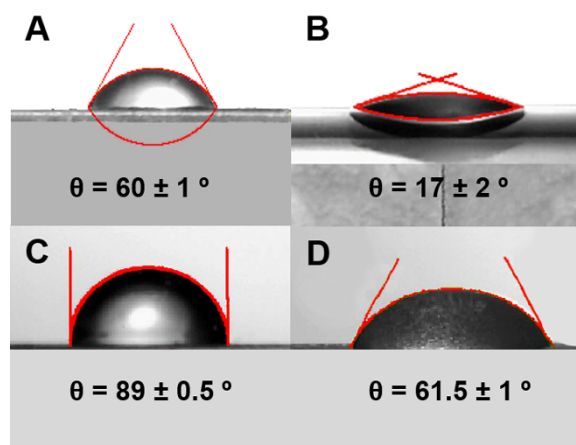

181 **Fig. S9** Contact angle measurements. Water contact angles on (A) PDMS and (B) vial surfaces. BSA droplet contact  
182 angles on (C) PDMS and (D) vial surfaces. Data represent mean  $\pm$  SEM (m=3).

### 183 Kinetics of BSA aggregation using ANS assay

184 The kinetics of BSA aggregation in the vial were monitored using ANS fluorescence intensity. A  
185 solution of  $2.5 \text{ mg}\cdot\text{ml}^{-1}$  BSA in 100 mM phosphate buffer (pH 7.4) was heated at  $70^\circ\text{C}$  for varying  
186 intervals (0, 5, 10, 15, 30, 45, 60, 120, 240, 360, and 780 minutes). The samples were then stained  
187 with  $280 \mu\text{M}$  ANS. The fluorescence intensity at 490 nm (excited at 350 nm) was recorded over  
188 time and is visible in Fig. S10.

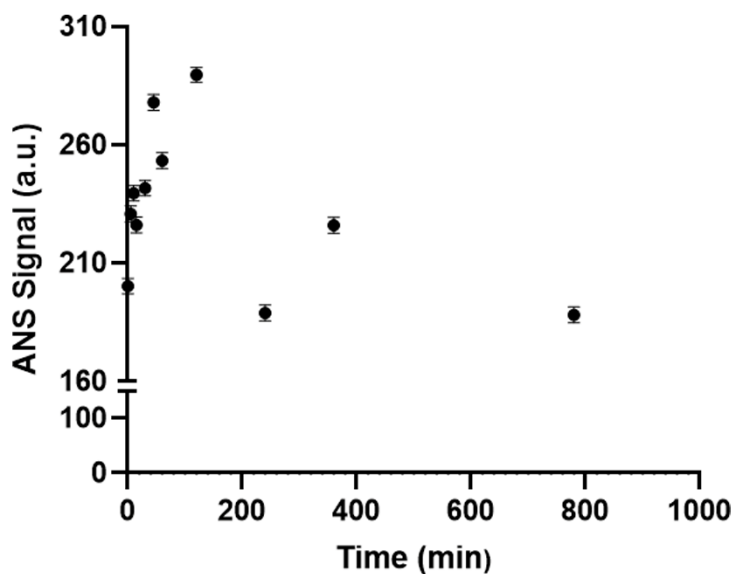

189 **Fig. S10** Kinetics of BSA aggregation monitored by ANS fluorescence.

190

191

192 **References**

193 1. K.L. Saar, E.V. Yates, T. Müller, S. Saunier, C.M. Dobson and T.P.J. Knowles, *Biophys. J.*, 2016,  
194 **110**, 555–560.

195 2. X. Weng, W. Zhao, S. Neethirajan and T. Duffield, *J. Nanobiotechnol.*, 2015, **13**, 1-8.

196 3. F. Kashanian, M.M. Masoudi, A. Shamloo, M. Habibi-Rezaei and A.A. Moosavi-Movahedi,  
197 *Bioproc. Biosyst. Eng.*, 2018, **41**, 707–714.

198 4. L. Fu, S. Vilette, S. Petoud, F. Fernandez-Alonso and M.L. Saboungi, *J. Phys. Chem. B.*, 2011, **115**,  
199 1881–1888.

200 5. H.N. Po and N.M. Senozan, *J. Chem. Educ.*, 2001, **78**, 1499–1503.

201
